# Supplementary material
Source: PubMed Central journal article supplement (PMC4281856)
Supplement: Supp_Fig1.pdf [file Supp_Fig1.pdf]

## Supplementary Data

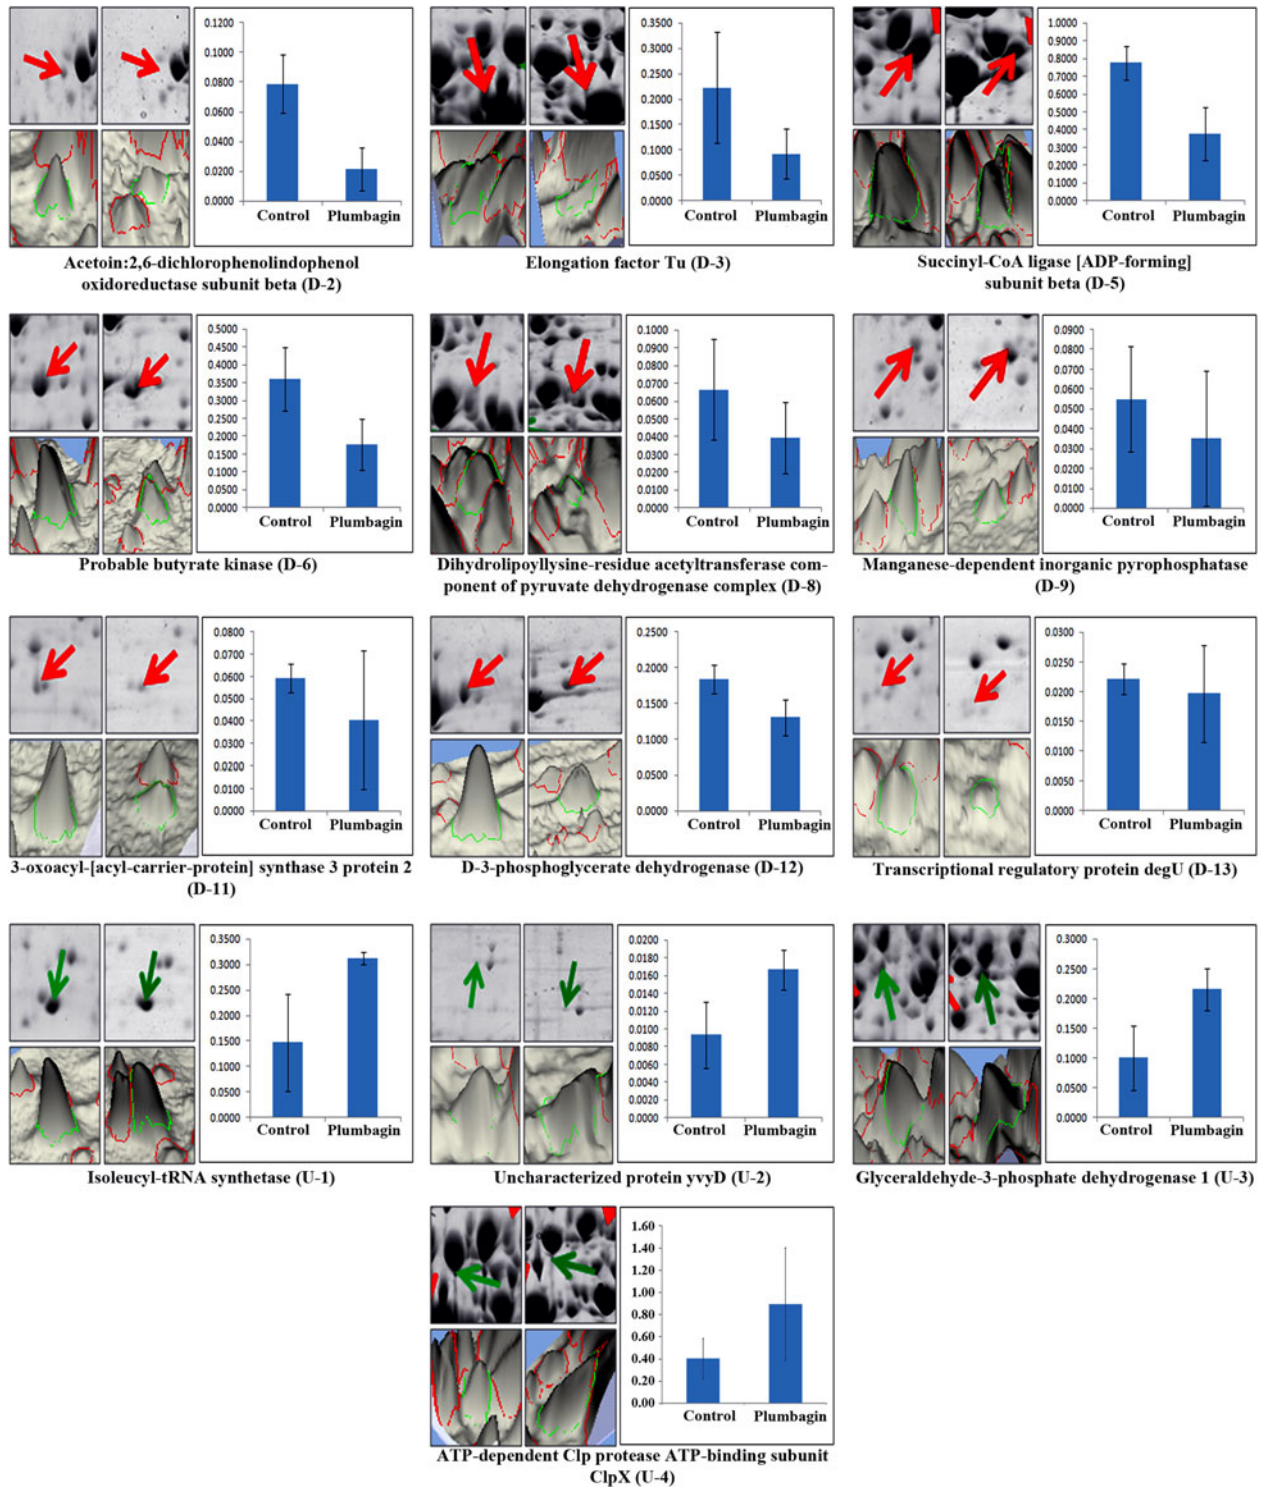

**SUPPLEMENTARY FIG. 1.** Differentially expressed proteins identified in 2-DE with their 3D views, histograms, and position on 2-DE gel images.
