# Supplementary material
Source: PubMed Central journal article supplement (PMC4281856)

**SUPPLEMENTARY FIG. 2.** Molecular docking analysis using AutoDock 4.0. 3D models of NADH dehydrogenase from *B. subtilis* and *E. coli* were generated using I-TASSER, and docking analysis was performed with plumbagin. The stick and surface model generated from AutoDock for NADH dehydrogenase from *B. subtilis* and *E. coli* are displayed and the ligand molecule is showed in *blue color*.

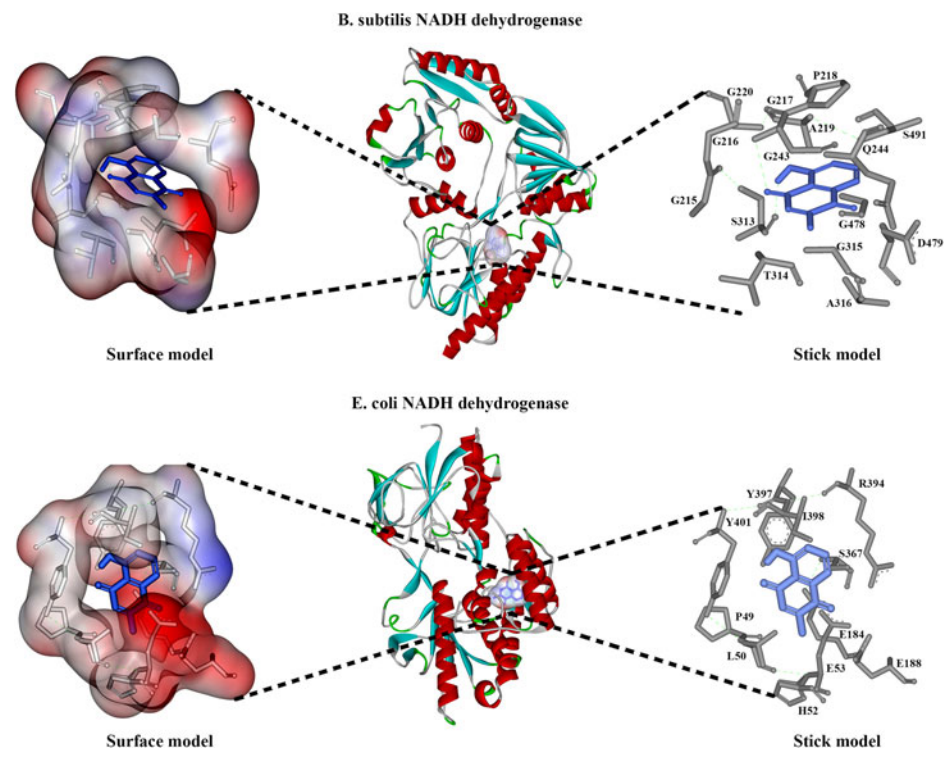

Supplement: Supp_Fig2.pdf [file Supp_Fig2.pdf]
